# Supplementary material for: Effect of Biodegradable Hydrophilic and Hydrophobic Emulsifiers on the Oleogels Containing Sunflower Wax and Sunflower Oil
Source: MDPI journal article supplement (doi:10.3390/gels7030133), 2021-09-07
Supplement: s1 [file s1]

Article

# Effect of Biodegradable Hydrophilic and Hydrophobic Emulsifiers on the Oleogels Containing Sunflower Wax and Sunflower Oil

Deepti Bharti <sup>1</sup>, Doman Kim <sup>2</sup>, Miguel Ângelo Cerqueira <sup>3</sup>, Biswaranjan Mohanty <sup>4</sup>, SK. Habibullah <sup>4</sup>, Indranil Banerjee <sup>5</sup> and Kunal Pal <sup>1,\*</sup>

## Supplementary file

### 1. Colorimetric analysis

Table S1. Values of absolute color difference ( $\Delta E$ ).

| Sample name | $\Delta E$      |
|-------------|-----------------|
| S1          | $6.27 \pm 0.59$ |
| S3          | $6.77 \pm 1.05$ |
| S5          | $4.40 \pm 0.29$ |
| S10         | $0.51 \pm 0.50$ |
| T1          | $1.12 \pm 0.09$ |
| T3          | $8.90 \pm 0.79$ |
| T5          | $6.60 \pm 0.87$ |
| T10         | $8.20 \pm 5.08$ |

### 2. Mechanical Study

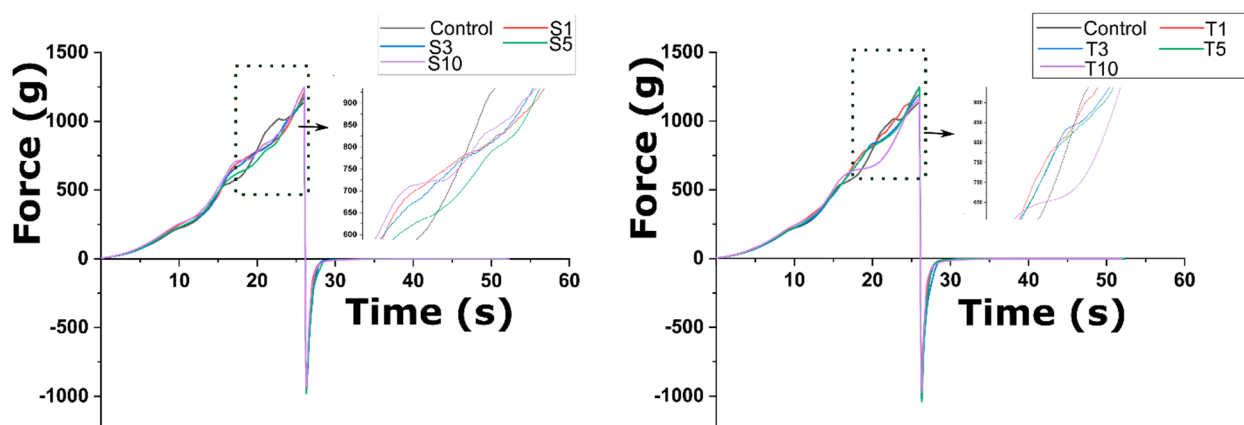

Figure S1. Spreadability profile of a) SPAN-80 formulation b) TWEEN-80 formulation.

**Table S2.** Parameters of spreadability test of oleogel.

| Samples | Firmness(g)<br>(F <sub>0</sub> ) | Work of shear(g-mm) (C <sub>0</sub> ) | Stickiness(g)<br>(S <sub>0</sub> ) | Work of adhesion(g-mm) (A <sub>0</sub> ) |
|---------|----------------------------------|---------------------------------------|------------------------------------|------------------------------------------|
| Control | 1140.47±77.47                    | 11468.39±325.88                       | -876.72±84.96                      | -715.63±4.59                             |
| S1      | 1123.11±92.63                    | 10285.46±1408.87                      | -807.72±4.86                       | -633.745±88.45                           |
| S3      | 1182.91±32.30                    | 11430.46±793.75                       | -930.82±113.80                     | -766.04±220.67                           |
| S5      | 1166.30±128.60                   | 11144.55±1182.20                      | -988.91±143.84                     | -804.60±167.19                           |
| S10     | 1249.38±187.93                   | 11938.27±1332.53                      | -943.84±162.30                     | -614.38±39.74                            |
| T1      | 1247.74±293.06                   | 12089.96±2312.73                      | -970.37±345.57                     | -732.29±19.60                            |
| T3      | 1194.51±75.85                    | 11594.57±389.57                       | -1024.05±149.28                    | -801.68±119.23                           |
| T5      | 1249.82±123.32                   | 11669.31±557.52                       | -1041.922±138.13                   | -735.96±32.44                            |
| T10     | 1164.41±29.25                    | 11166.34±221.46                       | -977.15±27.14                      | -665.56±48.46                            |

### 3. FTIR analysis

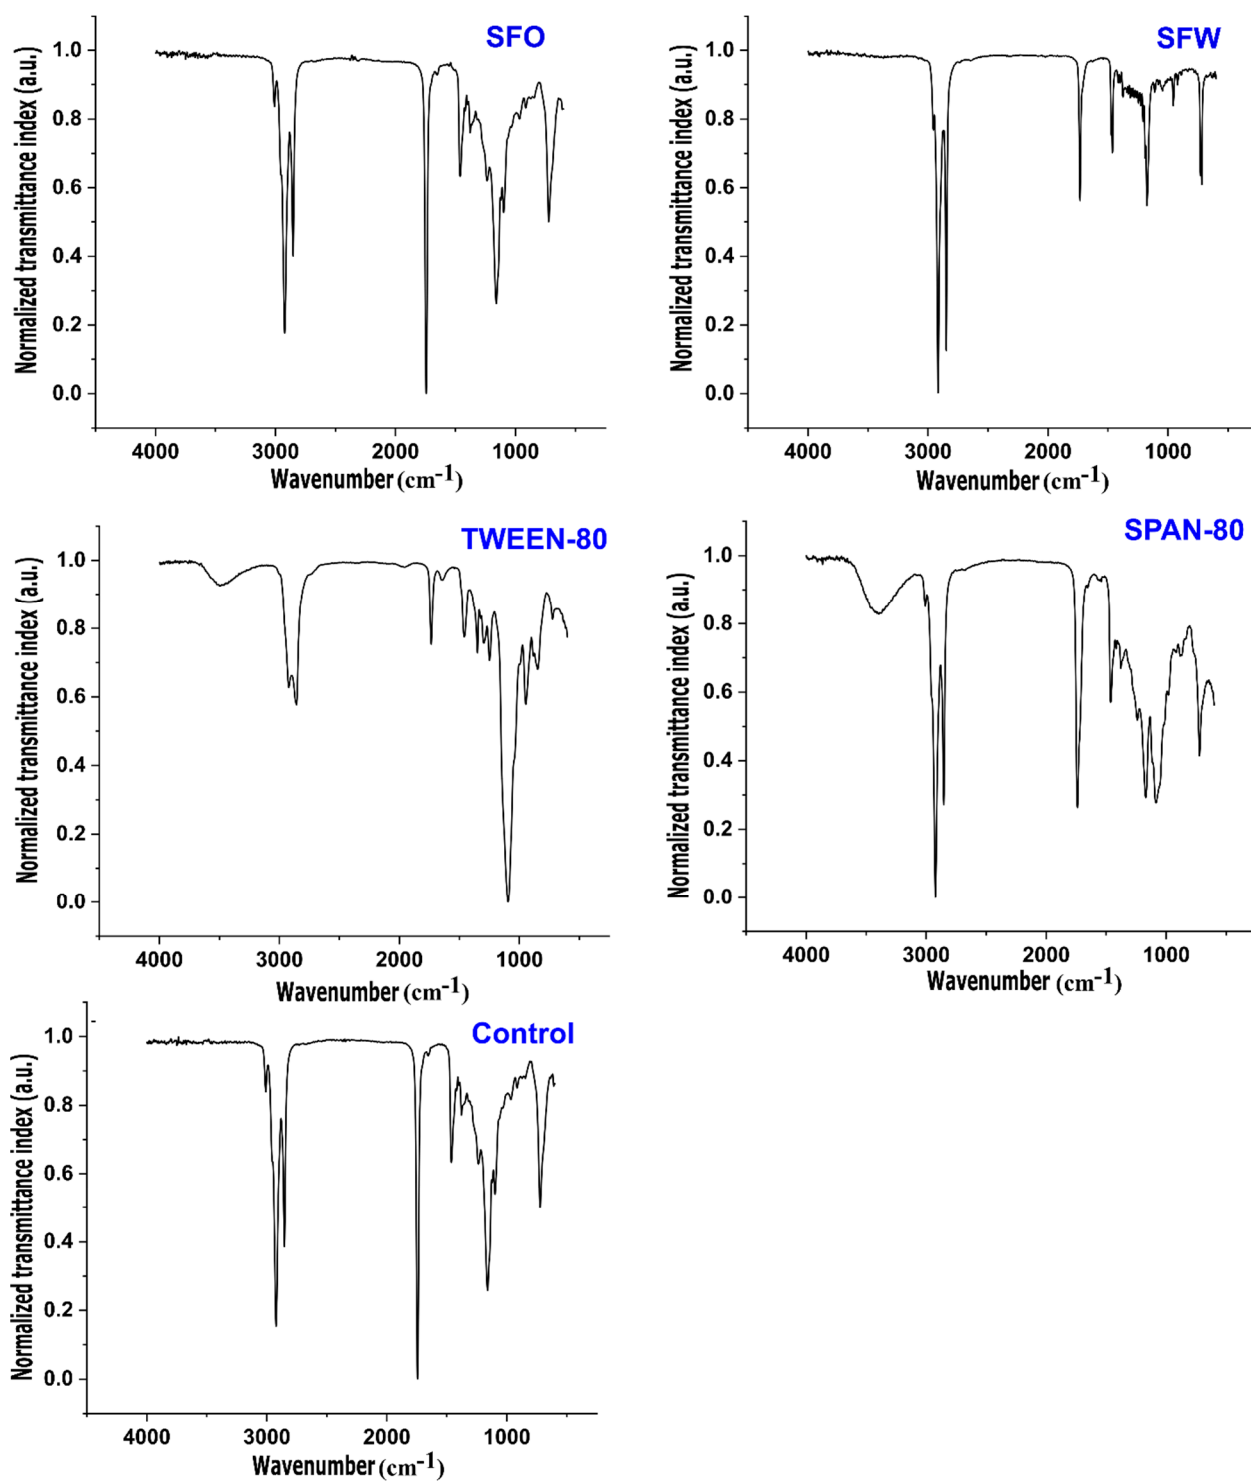

Figure S2. FTIR spectra of raw components and control oleogel.

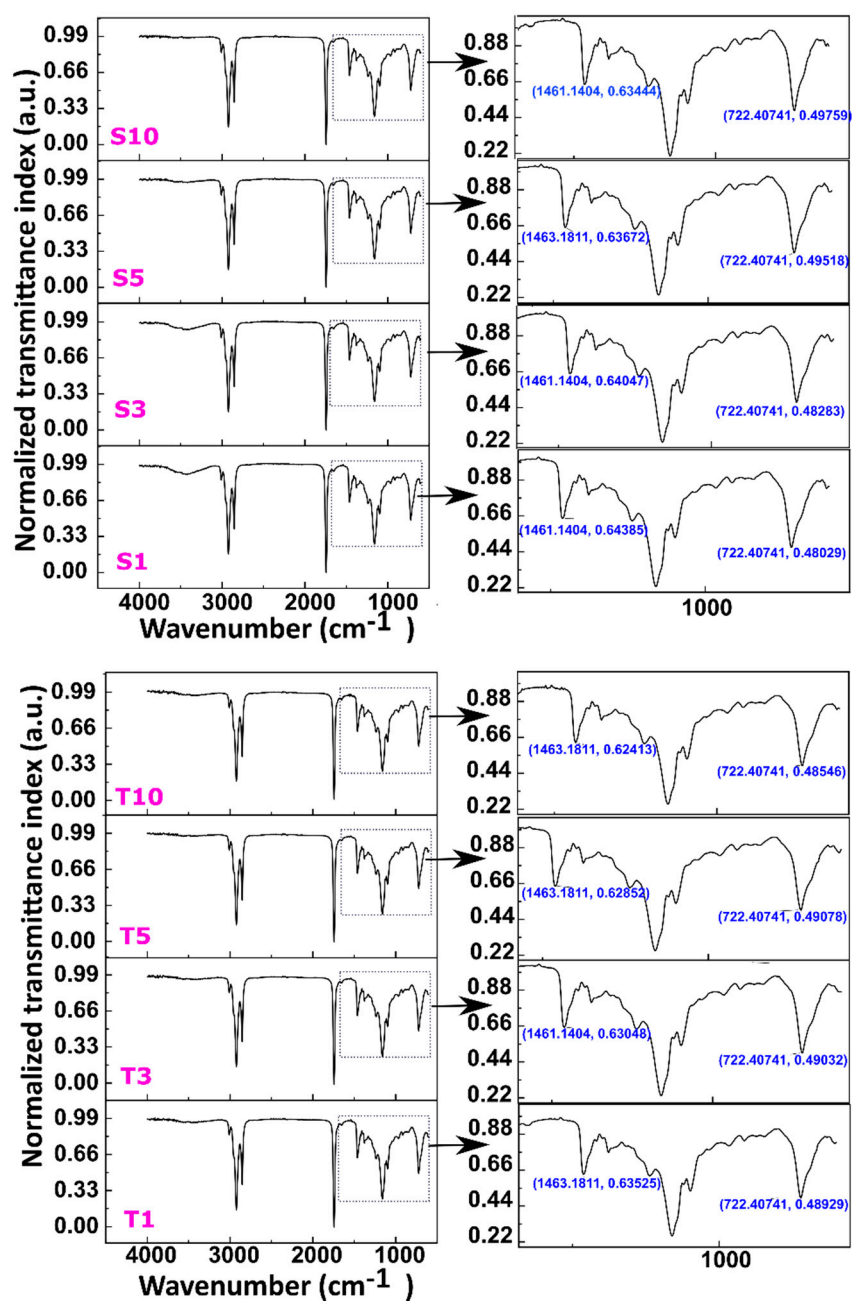

Figure S3. FTIR spectra all the formulations.

#### 4. DSC analysis

**Table S3.** Thermal properties of oleogels.

| <b>Formulations</b> | <b>Peaks</b> | <b>Temperature (°C)</b> | <b>Area</b> | <b>Onset(°C)</b> | <b>Peak (°C)</b> |
|---------------------|--------------|-------------------------|-------------|------------------|------------------|
| <b>Control</b>      | Peak 1       | 62.019                  | 0.3714      | 63.43            | 60.93            |
|                     | Peak 2       | 65.905                  | 0.084       |                  |                  |
| <b>S1</b>           | Peak 1       | 60.25                   | 0.318       | 63.37            | 60.87            |
|                     | Peak 2       | 64.490                  | 0.181       |                  |                  |
| <b>S3</b>           | Peak 1       | 64.105                  | 0.422       | 63.40            | 60.89            |
|                     | Peak 2       | 66.544                  | 0.054       |                  |                  |
| <b>S5</b>           | Peak 1       | 60.481                  | 0.320       | 63.41            | 59.665           |
|                     | Peak 2       | 65.110                  | 0.131       |                  |                  |
| <b>S10</b>          | Peak 1       | 61.547                  | 0.370       | 63.41            | 60.918           |
|                     | Peak 2       | 65.447                  | 0.113       |                  |                  |
| <b>T1</b>           | Peak 1       | 60.676                  | 0.442       | 63.41            | 60.911           |
|                     | Peak 2       | 64.939                  | 0.132       |                  |                  |
| <b>T3</b>           | Peak 1       | 63.320                  | 0.085       | 62.16            | 59.659           |
|                     | Peak 2       | 66.088                  | 0.079       |                  |                  |
| <b>T5</b>           | Peak 1       | 60.459                  | 0.070       | 63.41            | 59.665           |
|                     | Peak 2       | 67.202                  | 0.187       |                  |                  |
| <b>T10</b>          | Peak 1       | 64.205                  | 0.416       | 63.41            | 59.663           |
|                     | Peak 2       | 66.280                  | 0.050       |                  |                  |
